# Supplementary material for: Feasibility of digital contact tracing in low-income settings – pilot trial for a location-based DCT app
Source: Springer Nature journal article supplement (doi:10.1186/s12889-022-14888-x), 2023-01-21
Supplement: MOESM3 [file 23942682]

**Feasibility of digital contact tracing in low-income settings – pilot trial for a location-based DCT app**

Journal: BMC Public Health

*Eric Handmann, MD (first author, corresponding author)*

Department for Emergency Medicine, University Hospital Leipzig, Leipzig, Germany

Mail: Eric.Handmann@medizin.uni-leipzig.de; ORCID #0000-0001-7584-007X

*Sia Wata Camanor, Mosoka P. Fallah, Neima Candy, Davidetta Parker, André Gries, Thomas Grünewald***AF 3:** Detailed information of used smartphone models with number of logged GPS coordinates

| Phone brand | Model          | Android Version | Number of logged GPS coordinates |
|-------------|----------------|-----------------|----------------------------------|
| Tecno       | cf7k           | unknown         | 80                               |
| Tecno       | spark pro      | unknown         | 750                              |
| Tecno       | Spark 2        | unknown         | 0                                |
| Tecno       | la7            | unknown         | 2                                |
| Tecno       | y2             | 4               | 0                                |
| Tecno       | c8             | 5               | 17                               |
| Tecno       | one 5          | 5               | 0                                |
| Tecno       | j8             | 5               | 489                              |
| Tecno       | W5             | 6               | 465                              |
| Tecno       | l8 lite        | 6               | 1023                             |
| Tecno       | L9Plus         | 7               | 368                              |
| Tecno       | K7             | 7               | 2                                |
| Tecno       | k8             | 7               | 251                              |
| Tecno       | lc6            | 7               | 4                                |
| Tecno       | Phantom 6 Plus | 7               | 133                              |
| Tecno       | l9 plus        | 7               | 0                                |
| Tecno       | wx3p           | 7               | 0                                |
| Tecno       | cx             | 7               | 306                              |
| Tecno       | k7             | 7               | 13                               |
| Tecno       | wx3            | 7               | 82                               |
| Tecno       | f2             | 7               | 0                                |
| Tecno       | camon cx air   | 7               | 1                                |
| Tecno       | la7 pro        | 8               | 90                               |
| Tecno       | LB6            | 8               | 64                               |
| Tecno       | cf7k           | 8               | 53                               |
| Tecno       | la7 pro        | 8               | 0                                |
| Tecno       | cf8            | 8               | 0                                |
| Tecno       | b1             | 8               | 0                                |
| Tecno       | f1             | 8               | 0                                |
| Tecno       | ca8            | 8               | 66                               |
| Tecno       | ba2            | 8               | 1184                             |
| Tecno       | ca8            | 8               | 3                                |
| Tecno       | L c8           | 8               | 16                               |
| Tecno       | ba2            | 8               | 45                               |
| Tecno       | la7            | 8               | 5                                |
| Tecno       | camon 11 cf7   | 8               | 2                                |
| Tecno       | f1             | 8               | 0                                |
| Tecno       | f1             | 8               | 194                              |
| Tecno       | cf7k           | 8               | 1                                |

## Feasibility of digital contact tracing in low-income settings – pilot trial for a location-based DCT app

Journal: BMC Public Health

Eric Handmann, MD (first author, corresponding author)

Department for Emergency Medicine, University Hospital Leipzig, Leipzig, Germany

Mail: Eric.Handmann@medizin.uni-leipzig.de; ORCID #0000-0001-7584-007X

Sia Wata Camanor, Mosoka P. Fallah, Neima Candy, Davidetta Parker, André Gries, Thomas Grünewald

|         |             |         |      |
|---------|-------------|---------|------|
| Tecno   | Lb7         | 8       | 914  |
| Tecno   | lb6         | 8       | 119  |
| Tecno   | cf8         | 8       | 2    |
| Tecno   | ka7         | 8       | 0    |
| Tecno   | cf7         | 8       | 251  |
| Tecno   | kb7j        | 9       | 133  |
| Tecno   | cc6         | 9       | 5    |
| Tecno   | a6          | 9       | 187  |
| Tecno   | kb8         | 9       | 0    |
| Tecno   | cc7         | 9       | 3    |
| Tecno   | ab7         | 9       | 604  |
| Tecno   | lc6         | 9       | 0    |
| Tecno   | cc7         | 9       | 0    |
| Tecno   | KC8         | 9       | 0    |
| Tecno   | kc8         | 9       | 43   |
| Tecno   | kb7j        | 9       | 122  |
| Tecno   | cc7         | 9       | 1684 |
| Infinix | zero        | unknown | 48   |
| Infinix | hot 4       | 6       | 2005 |
| Infinix | x608        | 8       | 246  |
| Infinix | x5515       | 8       | 193  |
| Infinix | x609        | 8       | 2    |
| Infinix | X604        | 8       | 0    |
| Infinix | unknown     | 9       | 0    |
| Infinix | note 5      | 9       | 211  |
| Infinix | x652        | 9       | 1    |
| Itel    | unknown     | unknown | 0    |
| Itel    | it1556 Plus | 5       | 0    |
| Itel    | se          | 6       | 0    |
| Itel    | s31         | 6       | 0    |
| Itel    | s11         | 6       | 0    |
| Itel    | s32         | 6       | 0    |
| Itel    | s32         | 7       | 96   |
| Itel    | s32         | 7       | 247  |
| Itel    | s32         | 7       | 0    |
| Itel    | s73         | 7       | 0    |
| Itel    | s32         | 7       | 0    |
| Itel    | s32         | 7       | 3    |
| Itel    | a32f        | 8       | 0    |
| Itel    | a16         | 8       | 0    |
| Itel    | a16         | 8       | 0    |
| Itel    | A16 Plus    | 8       | 0    |

**Feasibility of digital contact tracing in low-income settings – pilot trial for a location-based DCT app**

Journal: BMC Public Health

*Eric Handmann, MD (first author, corresponding author)*

Department for Emergency Medicine, University Hospital Leipzig, Leipzig, Germany

Mail: Eric.Handmann@medizin.uni-leipzig.de; ORCID #0000-0001-7584-007X

*Sia Wata Camanor, Mosoka P. Fallah, Neima Candy, Davidetta Parker, André Gries, Thomas Grünewald*

|         |          |         |      |
|---------|----------|---------|------|
| Itel    | p32      | 8       | 1301 |
| Itel    | s15      | 9       | 319  |
| Itel    | s15      | 9       | 47   |
| Itel    | s15      | 9       | 240  |
| Samsung | sm g900v | unknown | 0    |
| Samsung | J7       | unknown | 344  |
| Samsung | A300     | 4       | 130  |
| Samsung | s3 mini  | 4       | 0    |
| Samsung | J5       | 5       | 0    |
| Samsung | note5    | 5       | 33   |
| Samsung | s6 edge  | 6       | 198  |
| Samsung | j7 prime | 6       | 143  |
| Samsung | j7       | 6       | 0    |
| Samsung | note4    | 6       | 342  |
| Samsung | unknown  | 6       | 6    |
| Samsung | note 4   | 6       | 0    |
| Samsung | s7       | 7       | 387  |
| Samsung | s6       | 7       | 210  |
| Samsung | note 5   | 7       | 9    |
| Samsung | sm-g920a | 7       | 0    |
| Samsung | s8       | 8       | 14   |
| Samsung | j4 plus  | 8       | 0    |
| Samsung | s4       | 8       | 93   |
| Samsung | s9 plus  | 8       | 1    |
| Samsung | s7       | 8       | 0    |
| Samsung | s7       | 8       | 202  |
| Samsung | Note 4   | 8       | 380  |
| Samsung | J3       | 8       | 219  |
| Samsung | s7       | 8       | 1037 |
| Samsung | Note8    | 9       | 1739 |
| Samsung | A7       | 9       | 1    |
| Samsung | j8       | 9       | 2    |
| Samsung | s8 plus  | 9       | 1424 |
| Samsung | s8       | 9       | 227  |
| Samsung | j8       | 9       | 14   |
| Samsung | a30      | 9       | 890  |
| BLU     | r1 hd    | 6       | 152  |
| BLU     | m6 lte   | 6       | 3    |
| BLU     | c6       | 8       | 415  |
| HTC     | unknown  | 7       | 188  |
| HTC     | U11      | 8       | 318  |
| Nokia   | 311      | 9       | 825  |

## Feasibility of digital contact tracing in low-income settings – pilot trial for a location-based DCT app

Journal: BMC Public Health

Eric Handmann, MD (first author, corresponding author)

Department for Emergency Medicine, University Hospital Leipzig, Leipzig, Germany

Mail: Eric.Handmann@medizin.uni-leipzig.de; ORCID #0000-0001-7584-007X

Sia Wata Camanor, Mosoka P. Fallah, Neima Candy, Davidetta Parker, André Gries, Thomas Grünewald

|          |            |         |      |
|----------|------------|---------|------|
| LG       | Is740      | 4       | 55   |
| LG       | K8         | 7       | 2    |
| Orange   | unknown    | unknown | 0    |
| Orange   | rise 32    | 6       | 201  |
| One      | plus a5010 | unknown | 23   |
| One      | plus a3003 | 9       | 24   |
| Vivo     | unknown    | 9       | 2    |
| Huawei   | p smart    | 8       | 8    |
| ZTT/ZTE  | V6         | 6       | 40   |
| ZTT/ZTE  | note5      | 7       | 686  |
| ZTT/ZTE  | unknown    | 7       | 160  |
| Motorola | sx4        | 9       | 2    |
| Xiaomi   | 5 plus     | 7       | 279  |
| Xiaomi   | note 5 pro | 9       | 1045 |
| Alcatel  | unknown    | 7       | 1257 |
| MobiWire | Halona     | 5       | 117  |
| A3       | pro        | 9       | 1    |
| unknown  | unknown    | unknown | 67   |
