# Supplementary material for: Feasibility of digital contact tracing in low-income settings – pilot trial for a location-based DCT app
Source: Springer Nature journal article supplement (doi:10.1186/s12889-022-14888-x), 2023-01-21
Supplement: MOESM6 [file 23942682]

**Feasibility of digital contact tracing in low-income settings – pilot trial for a location-based DCT app**

Journal: BMC Public Health

Eric Handmann, MD (first author, corresponding author)

Department for Emergency Medicine, University Hospital Leipzig, Leipzig, Germany

Mail: Eric.Handmann@medizin.uni-leipzig.de; ORCID #0000-0001-7584-007X

Sia Wata Camanor, Mosoka P. Fallah, Neima Candy, Davidetta Parker, André Gries, Thomas Grünewald

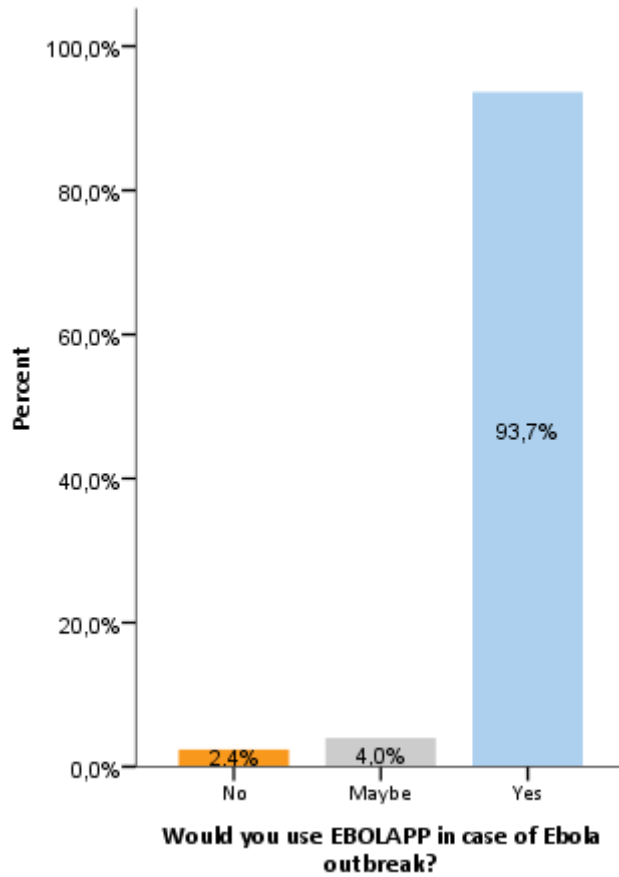

AF 6 Survey results on overall acceptance of the DCT
